# Supplementary material for: ACFIS 2.0: an improved web-server for fragment-based drug discovery via a dynamic screening strategy
Source: PubMed Central journal article supplement — Nucleic Acids Res. 2023 May 9;51(W1):W25–32. doi: 10.1093/nar/gkad348 (PMC10320121; doi:10.1093/nar/gkad348), 2023-05-09
Supplement: gkad348_supplemental_file.pdf [file gkad348_supplemental_file.pdf]

## Supplementary data

### **ACFIS 2.0: an improved web-server for fragment-based drug discovery via a dynamic screening strategy**

Xing-Xing Shi<sup>1,†</sup>, Zhi-Zheng Wang<sup>1,†</sup>, Fan Wang<sup>1,†</sup>, Ge-Fei Hao<sup>1,\*</sup> and Guang-Fu Yang<sup>1,\*</sup>

<sup>†</sup> National Key Laboratory of Green Pesticide, Key Laboratory of Pesticide & Chemical Biology, Ministry of Education, Central China Normal University, Wuhan 430079, P.R. China

\* To whom correspondence should be addressed. Email: gfyang@mail.cnu.edu.cn (Guang-Fu Yang), gefei\_hao@foxmail.com (Ge-Fei Hao)

<sup>†</sup> Joint First Authors

## Text S1. Materials and methods

### 1. Fragment Deconstruction

The fragment deconstruction analysis starts from a protein-ligand complex in PDB format. Firstly, an energy minimization was performed using Amber 16 to optimize the interaction between protein and ligand [1]. The, ligand structure binding in the pocket is deconstructed into fragments according to the retrosynthetic analysis by using DAIM software [2]. Single bond is broken and hydrogen is used to link with heavy atom to make the total charge value of each 'piece' integer.

### 2. Core Fragment Identification.

After fragment deconstruction, the binding free energy ( $\Delta G$ ) is calculated for each protein-fragment structure using the combination of the MM\_PBSA method [3] for the enthalpy and an empirical method for the entropy [4] (Equation 1). Then, ligand efficiency (LE) which is defined as absolute value of  $\Delta G$  divided by the heavy atom count (HAC) is obtained. All fragments deconstructed from original ligand is sorted based on LE. Fragment with highest LE value is generally identified as core fragment that theoretically has a highly conserved binding conformation and efficient contribution to the entire binding affinity.

$$\Delta G_{\text{bind}} = \Delta E_{\text{gas}} + \Delta G_{\text{sol}} - T\Delta S = \Delta E_{\text{bind}} - T(\Delta S_{\text{sol}} + \Delta S_{\text{conf}}) \quad (1)$$

### 3. Dynamic Fragment Growing.

Dynamic fragment growing begins with the protein-core fragment complex structure. At first, energy minimization and molecular dynamics (MD) simulation are performed on protein-core fragment complex using AMBER16 package. Topology and coordinate files is created in the tleap module based on the Amber ff14SB force field [5] and general AMBER force field (GAFF) [6]. The complex system is solvated in an octahedron box of TIP3P water, with at least 10 Å between the solute and each box edge [7]. Counter ions, Na<sup>+</sup> or Cl<sup>-</sup>, is added to neutralize the net charges of the system. The energy minimization was achieved through three stages: (i) only water molecules and ions are allowed to move, (ii) backbone atoms of protein are restrained and the remaining atoms are allowed to move, (iii) all atoms in the system could move freely. In each stage, 1000 steepest descent steps and 1000 conjugated gradient steps with a convergence criterion of 0.1 kcal mol<sup>-1</sup> Å<sup>-1</sup> were carried out in a vacuum. The MD simulation process using explicit-solvent particle mesh Ewald (PME) model is achieved through two stages: (i) the system is heated from 0 to 300K over 500 ps in the NVT ensemble with restraints on the solute (ii) 0.5 ns of MD in the NTP (T = 300 K and P = 1 atm) ensemble is carried out four times successively (4 x 0.5ns = 2ns), saving the structure every 2 ps

Subsequently, RMSD-based clustering is performed on complex structures extracted from entire merged MD trajectories using the cpptraj module in AMBER16. The RMSD cutoff for the neighboring cluster is set as 0.5 Å. A complex structure is randomly picked from each of the top five clusters with the

largest number of conformations, thereby obtaining an ensemble of protein-core fragment complex conformations with large structural difference.

Finally, based on typical protein-core fragment complex structure, new fragment in selected fragment library is linked to the junction of core fragment placed in the binding site using AutoGrow2.0 [8]. The orientation of growing fragment was optimized with minimum steric clashes (overlap volume  $\leq 4 \text{ \AA}^3$ ) to the surrounding residues. For generated protein-ligand complex structure, energy minimization is performed using the Sander module of Amber16, and binding free energy ( $\Delta G$ ) is calculated using the combination of the MM\_PBSA method [3] for the enthalpy and an empirical method for the entropy [4] (Equation 1). Among a set of complex conformations containing the same ligand, the conformation with the lowest  $\Delta G$  value is used the ultimate complex structure for subsequent ligand comparisons.

#### 4. Molecular Property Evaluation

At the step of comparing generated ligands, a series of molecular properties are predicted for each ligand, including binding affinity, physicochemical properties, drug-likeness, pesticide-likeness and synthetic accessibility. Binding affinity is predicted through binding free energy calculation using the combination of the MM\_PBSA method [3] for the enthalpy and an empirical method for the entropy [4] (Equation 1). The physicochemical properties are calculated using Mordred software [9], covering molecular weight (MW), hydrogen bond receptor (HBA), hydrogen bond donor (HBD), water partition coefficient (LogP), and so on. The drug-likeness is evaluated according to physicochemical properties, using qualitative Lipinski's rule of five [10], Ghose's rule [11], as well as the quantitative QED score [12]. The pesticide-likeness was evaluated according to a qualitative rule called Hao's rule [13]. In addition, the synthetic accessibility score is evaluated using RDKit [14].

## **Text S2. Description of validation protocol for ACFIS 2.0**

### 1. Dataset preparation

As mentioned in the main text, a series of compounds that have been reported with experimental binding affinities or biological activity were collected as test set for the performance validation of ACFIS 2.0. A total of 122 compounds was selected as test objects after literature investigation. Each compound in the test set was required to meet the following restrictions:

1) There is available experimental data on its binding affinity or biological activity.

2) The qualitative conclusion on its affinity or activity could be drawn (e.g. Compound A showed high affinity for X protein, while Compound B exhibited low affinity for X protein) based on the responding reference.

3) The crystal structure of its protein-ligand complex (at least its receptor protein) is available.

4) The core fragment in the compound could be identified based on the responding reference.

Targeting a specific protein, a pair of compounds were generally collected, in which one had high affinity/ activity and the other one showed relatively low affinity/ activity. The case in which the tested compound exhibited relatively high affinity/ activity was classified into the positive sample group, otherwise it is classified as a negative sample group. Overall, the test set was composed of 61 positive samples and 61 negative samples. The data of 122 cases were provided in Table S1.

### 2. Calculation for each case using ACFIS 2.0

For each case/ sample, a calculation task in CAND\_GEN mode was designed to evaluate the predictive performance of ACFIS 2.0. The inputs of a task consisted of a corresponding core fragment-receptor protein complex structure (obtained by deconstructing the protein-ligand complex reported in PDBbind database) and the fragment library built specifically for performance testing (see Figure S3). For each task, ACFIS 2.0 outputted a list of all generated ligands, in which the ligands were sorted by their predicted binding affinities from strong to weak (by their predicted binding free energies from low and high). In this list, the tested compound and its paired compound were designedly contained.

### 3. Performance evaluation for ACFIS 2.0

In each calculation task (mentioned above), ACFIS 2.0 was expected to reasonably sort all generated ligands and assign the tested compound with an appropriate rank. In principle, the tested compounds that had been experimentally measured to have high affinity or activity should be at the top of the list, while those with low experimental affinity/ activity should be ranked after its paired compound with higher affinity/ activity.

For positive samples, the top 20% was manually set as the ranking threshold. If a test compound ranks in the top 20% of the outputted complete list, it is computationally considered to have high affinity/

activity, and the corresponding case is predicted as positive. Otherwise, the corresponding case is predicted as negative.

For negative samples, if a test compound ranks after its paired compound in the outputted list, the corresponding case is predicted as negative. Otherwise, the corresponding case is predicted as positive.

After all testing tasks were completed, calculation results were compared with experimental findings. According to our statistics, 55 was true positive (TP), 8 was false positive (FP), 6 was false negative (FN), and 53 was true negative (TN). Here are the definitions of these elements:

- 1) TP refers to the number of positive samples correctly predicted as positive.
- 2) FP refers to the number of negative samples incorrectly predicted as positive.
- 3) FN refers to the number of positive samples incorrectly predicted as negative.
- 4) TN refers to the number of negative samples incorrectly predicted as negative.

At last, the accuracy, precision, sensitivity, specificity, and negative positive value (NPV) of ACFIS 2.0 in this performance testing were measured.

$$\text{Accuracy} = (\text{TP} + \text{TN}) / (\text{TP} + \text{FP} + \text{FN} + \text{TN}) = 0.885$$

$$\text{Precision} = \text{TP} / (\text{TP} + \text{FP}) = 0.873$$

$$\text{Sensitivity} = \text{TP} / (\text{TP} + \text{FN}) = 0.901$$

$$\text{Specificity} = \text{TN} / (\text{FP} + \text{TN}) = 0.868$$

$$\text{NPV} = \text{TN} / (\text{TN} + \text{FN}) = 0.898$$

|           |          | Experimental                      |                          |                           |
|-----------|----------|-----------------------------------|--------------------------|---------------------------|
|           |          | Positive                          | Negative                 |                           |
| Predicted | Positive | 45<br>(TP <sup>1</sup> )          | 14<br>(FP <sup>2</sup> ) | Precision<br>0.762        |
|           | Negative | 16<br>(FN <sup>3</sup> )          | 47<br>(TN <sup>4</sup> ) | NPV <sup>5</sup><br>0.746 |
|           |          | Sensitivity <sup>6</sup><br>0.738 | Specificity<br>0.770     | Accuracy<br>0.754         |

<sup>1</sup> True Positive <sup>2</sup> False Positive <sup>3</sup> False Negative

<sup>4</sup> True Negative <sup>5</sup> Negative Predictive Value <sup>6</sup> Also called "Recall"

**Figure S1.** The performance of ACFIS (old version) when using the same test set as ACFIS 2.0

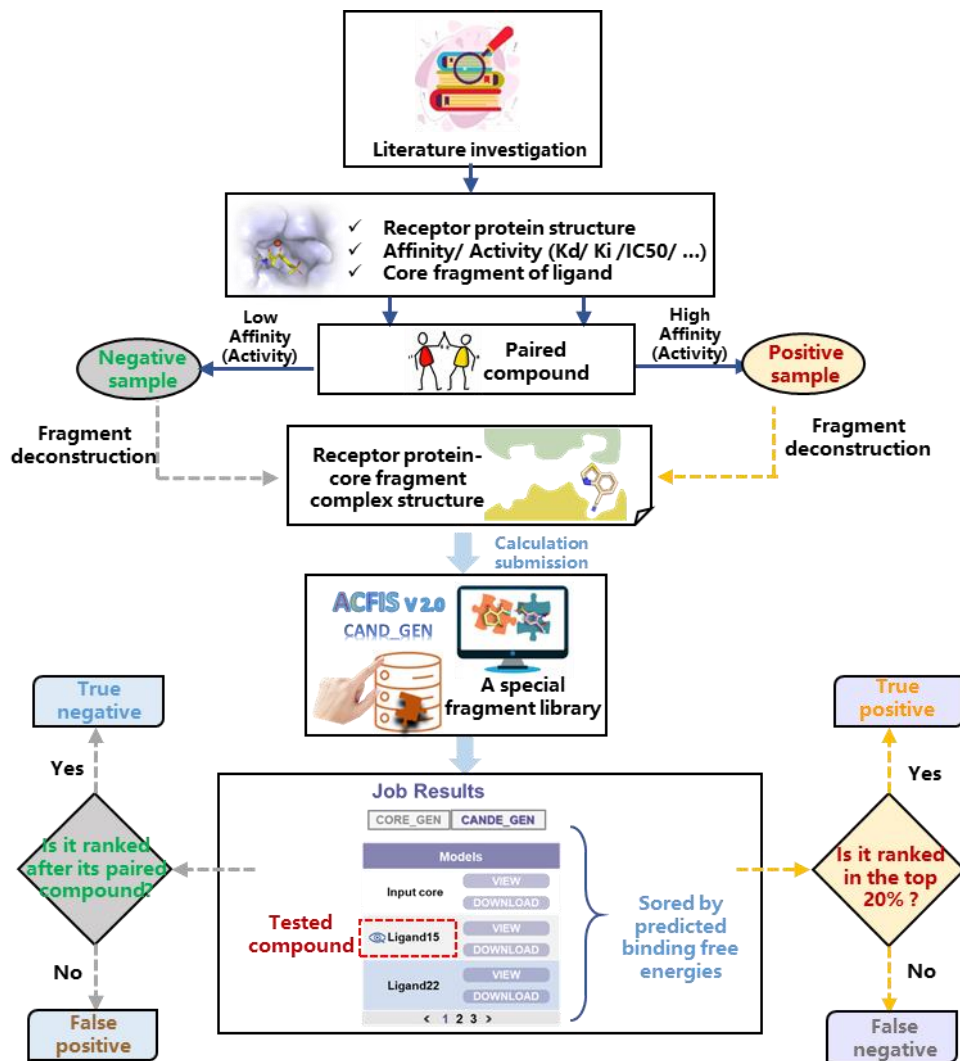

Figure S2. Validation workflow for ACFIS 2.0

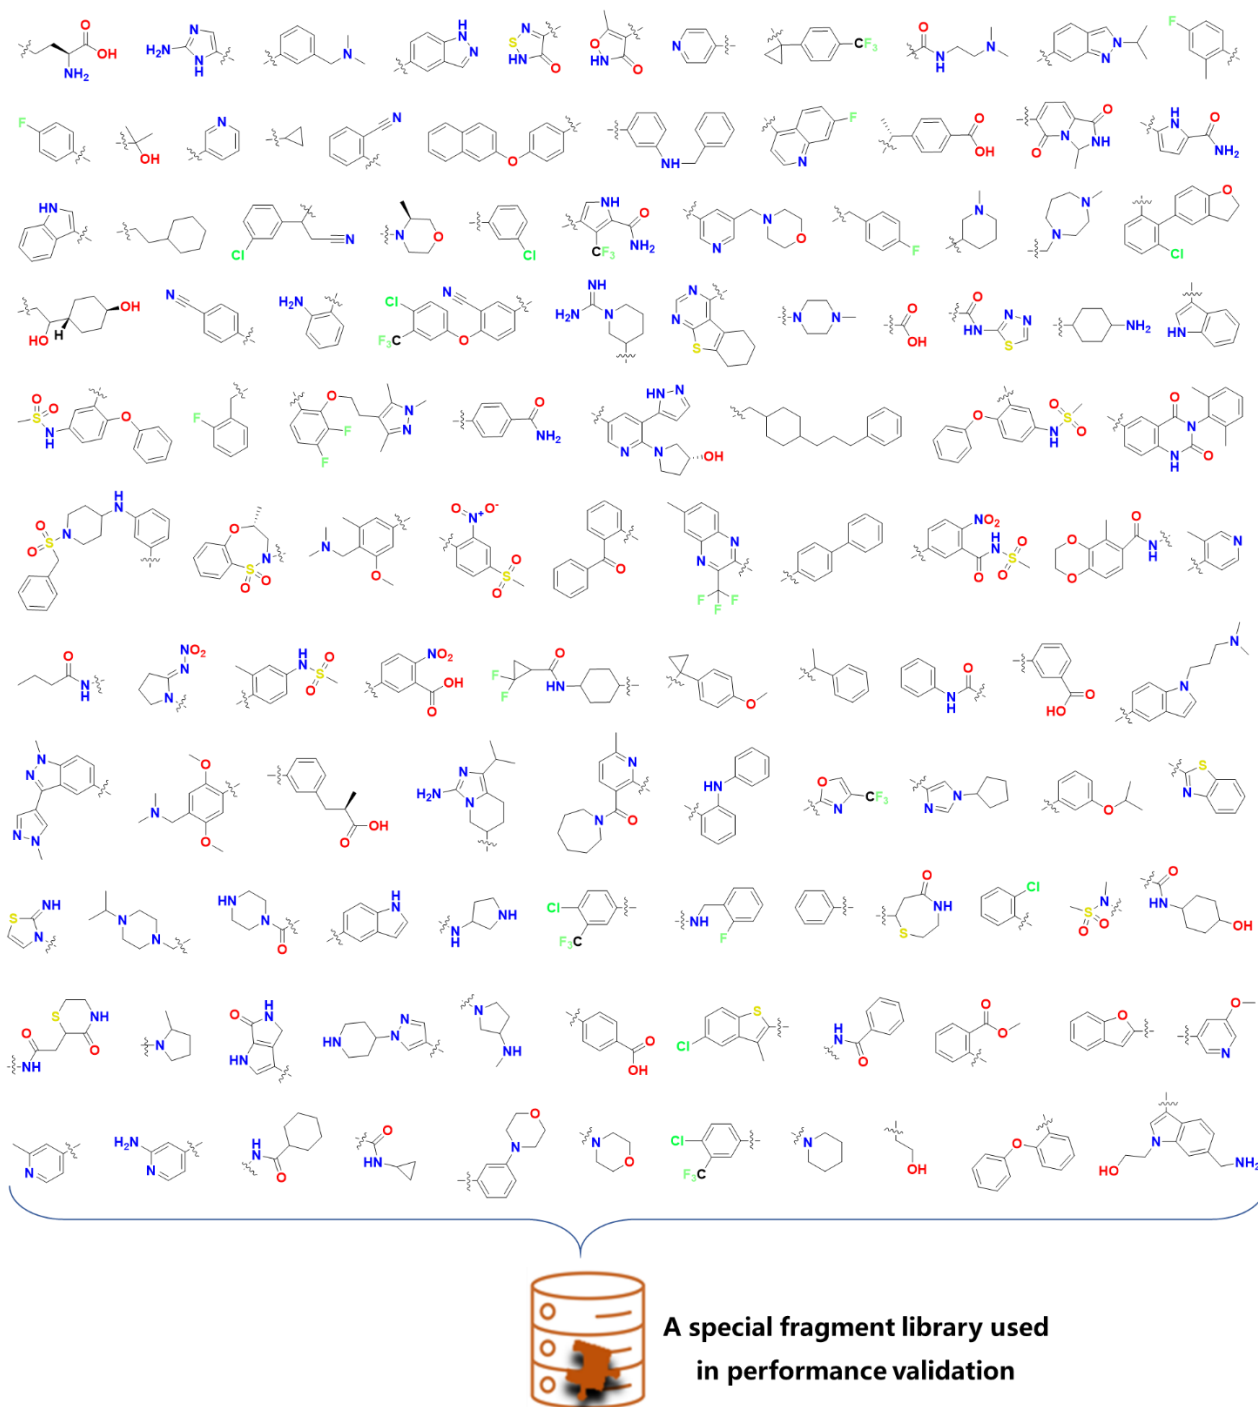

**Figure S3.** Fragment library used in ACFIS 2.0 performance validation



**Table S1. The test set of 122 cases used for performance validation and the predictive results of ACFIS 2.0/ ACFIS for these cases**

| No. | Protein Name                    | Tested Compound                                                                     | Experimental Data                   |                              |                           |              | Inputted Core Structure                                                               | Computational Data (ACFIS 2.0) |                            |      | Computational Data (ACFIS 1.0) |                            |       |
|-----|---------------------------------|-------------------------------------------------------------------------------------|-------------------------------------|------------------------------|---------------------------|--------------|---------------------------------------------------------------------------------------|--------------------------------|----------------------------|------|--------------------------------|----------------------------|-------|
|     |                                 |                                                                                     | Affinity / Activity                 | PDB of its complex structure | Ref (DOI)                 | Sample Group |                                                                                       | Rank of Test Com.              | Qualitative Classification | Fact | Rank of Test Com.              | Qualitative Classification | Fact  |
| 1   | Arginase-1                      | 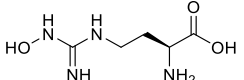   | $K_d = 47.51$ nM<br>(High Affinity) | 3KV2                         | 10.1016/j.abb.2010.02.004 | Positive     |    | 17                             | Positive                   | True | 18                             | Positive                   | True  |
| 2   |                                 |    | $K_d = 3$ nM<br>(Low Affinity)      | 3MFV                         | 10.1021/jm100306a         | Negative     |                                                                                       | 68                             | Negative                   | True | 10                             | Positive                   | False |
| 3   | Protein-tyrosine phosphatase 1b |    | $K_i = 0.004$ uM<br>(High Activity) | 2QBP                         | 10.1021/jm0702478         | Positive     |    | 14                             | Positive                   | True | 11                             | Positive                   | True  |
| 4   |                                 |    | $K_i = 0.47$ uM<br>(Low Activity)   | 2QBP                         |                           | Negative     |                                                                                       | 26                             | Negative                   | True | 43                             | Negative                   | True  |
| 5   | $\beta$ -lactamase              |   | $K_i = 1.1$ uM<br>(High Activity)   | 4DE1                         | 10.1021/jm2014138         | Positive     |  | 15                             | Positive                   | True | 56                             | Negative                   | False |
| 6   |                                 |  | $K_i = 76.0$ uM<br>(Low Activity)   | 4DE2                         |                           | Negative     |                                                                                       | 86                             | Negative                   | True | 1                              | Positive                   | False |
| 7   | Glutamate receptor 2            |  | $K_i = 531$ nM<br>(High Activity)   | 3BFU                         | 10.1021/jm701126w         | Positive     |  | 12                             | Positive                   | True | 14                             | Positive                   | True  |
| 8   |                                 |  | $K_d = 12.8$ uM<br>(Low Affinity)   | 1P1Q                         | 10.1073/pnas.1037393100   | Negative     |                                                                                       | 39                             | Negative                   | True | 80                             | Negative                   | True  |

|    |                                            |                                                                                     |                                                 |      |                             |          |                                                                                       |    |          |       |    |          |       |
|----|--------------------------------------------|-------------------------------------------------------------------------------------|-------------------------------------------------|------|-----------------------------|----------|---------------------------------------------------------------------------------------|----|----------|-------|----|----------|-------|
| 9  | Transporter                                | 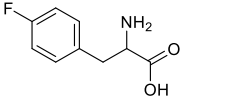   | $K_i = 950 \text{ nM}$<br>(High Activity)       | 3F3C | 10.1126/science.1166777     | Positive |    | 16 | Positive | True  | 77 | Negative | False |
| 10 |                                            |    | $K_i = 64.8 \text{ uM}$<br>(High Activity)      | 3F3A |                             | Negative |                                                                                       | 77 | Negative | True  | 39 | Positive | False |
| 11 | Apolipoprotein E4                          |    | $K_d < 5 \text{ uM}$<br>(High Affinity)         |      | 10.1021/cs.jmedchem.9b00178 | Positive |    | 51 | Negative | False | 15 | Positive | True  |
| 12 |                                            |    | $K_d = 30 \text{ uM}$<br>(Low Affinity)         | 6NCO |                             | Negative |                                                                                       | 49 | Positive | False | 62 | Negative | True  |
| 13 | Indoleamine 2,3-dioxygenase 1              |    | $IC_{50} = 0.028 \text{ uM}$<br>(High Activity) | 6O3I | 10.1021/cs.jmedchem.9b00662 | Positive |    | 12 | Positive | True  | 6  | Positive | True  |
| 14 |                                            |    | $IC_{50} = 0.135 \text{ uM}$<br>(Low Activity)  |      |                             | Negative |                                                                                       | 11 | Positive | False | 43 | Negative | True  |
| 15 | Palmitoleyl-protein carboxylesterase NOTUM |   | $IC_{50} = 0.032 \text{ uM}$<br>(High Activity) | 6R8Q | 10.1039/c9md00096h          | Positive |   | 3  | Positive | True  | 45 | Negative | False |
| 16 |                                            |  | $IC_{50} = 33 \text{ uM}$<br>(Low Activity)     | 6G25 |                             | Negative |                                                                                       | 28 | Negative | True  | 90 | Negative | True  |
| 17 | Histone-lysine N-methyltransferase NSD3    |  | $IC_{50} = 1.9 \text{ uM}$<br>(High Activity)   | 6G2F | 10.1038/s41589-019-0310-x   | Positive |  | 17 | Positive | True  | 10 | Positive | True  |

|    |                                         |                                                                                     |                                                |      |                                  |          |                                                                                       |    |          |      |     |          |      |
|----|-----------------------------------------|-------------------------------------------------------------------------------------|------------------------------------------------|------|----------------------------------|----------|---------------------------------------------------------------------------------------|----|----------|------|-----|----------|------|
| 18 |                                         | 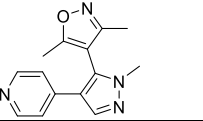   | IC <sub>50</sub> = 13 uM<br>(Low Activity)     | 6G25 |                                  | Negative |                                                                                       | 36 | Negative | True | 58  | Negative | True |
| 19 | D-3-phosphoglycerate dehydrogenase      |    | IC <sub>50</sub> = 0.4 uM<br>(High Activity)   | 6RJ3 | 10.1021/a<br>cs.jmedchem.9b00718 | Positive |    | 1  | Positive | True | 9   | Positive | True |
| 20 |                                         |    | K <sub>d</sub> = 100 uM<br>(Low Affinity)      | 6RIH |                                  | Negative |                                                                                       | 95 | Negative | True | 63  | Negative | True |
| 21 | Phosphopantetheine adenyltransferase    |    | IC <sub>50</sub> = 0.037 uM<br>(High Activity) | 6CCK | 10.1021/a<br>cs.jmedchem.7b01691 | Positive |    | 6  | Positive | True | 19  | Positive | True |
| 22 |                                         |    | IC <sub>50</sub> = 31 uM<br>(Low Activity)     | 6CCM |                                  | Negative |                                                                                       | 57 | Negative | True | 103 | Negative | True |
| 23 | 7,8-dihydro-8-oxoguanine triphosphatase |   | IC <sub>50</sub> = 8 nM<br>(High Activity)     | 6F22 | 10.1021/a<br>cs.jmedchem.7b01884 | Positive |   | 9  | Positive | True | 8   | Positive | True |
| 24 |                                         |  | IC <sub>50</sub> = 0.02 uM<br>(Low Activity)   |      |                                  | Negative |                                                                                       | 43 | Negative | True | 67  | Negative | True |
| 25 | Human N-myristoyltransferase            |  | IC <sub>50</sub> < 1 nM<br>(High Activity)     | 5MU6 | 10.1038/s<br>41557-018-0039-2    | Positive |  | 2  | Positive | True | 10  | Positive | True |

|    |                                                          |  |                                                |      |                                          |          |  |    |          |      |    |          |       |
|----|----------------------------------------------------------|--|------------------------------------------------|------|------------------------------------------|----------|--|----|----------|------|----|----------|-------|
| 26 |                                                          |  | IC <sub>50</sub> =20 uM<br>(Low Activity)      | 5O4V |                                          | Negative |  | 28 | Negative | True | 60 | Negative | True  |
| 27 | MNK1/2                                                   |  | IC <sub>50</sub> = 0.028 uM<br>(High Activity) | 6CK3 | 10.1021/a<br>cs.jmedch<br>em.7b017<br>95 | Positive |  | 11 | Positive | True | 17 | Positive | True  |
| 28 |                                                          |  | IC <sub>50</sub> = 0.69 uM<br>(Low Activity)   | 6CJE |                                          | Negative |  | 16 | Negative | True | 77 | Negative | True  |
| 29 | BCR-<br>ABL1                                             |  | IC <sub>50</sub> =0.5 uM<br>(High Activity)    | 5MO4 | 10.1038/n<br>ature2170<br>2              | Positive |  | 5  | Positive | True | 16 | Positive | True  |
| 30 |                                                          |  | Kd =2 uM<br>(Low Activity)                     |      |                                          | Negative |  | 28 | Negative | True | 70 | Negative | True  |
| 31 | Cyclin-<br>dependent<br>kinase 8                         |  | IC <sub>50</sub> =3 nM<br>(High Activity)      | 5XS2 | 10.1016/j.<br>bmcl.2017<br>.07.080       | Positive |  | 23 | Positive | True | 39 | Negative | False |
| 32 |                                                          |  | IC <sub>50</sub> = 0.24 uM<br>(Low Activity)   |      |                                          | Negative |  | 27 | Negative | True | 25 | Positive | False |
| 33 | Platelet-<br>activating<br>factor<br>acetylhydr<br>olase |  | IC <sub>50</sub> =14 nM<br>(High Activity)     | 5YEA | 10.1021/a<br>cs.jmedch<br>em.7b015<br>30 | Positive |  | 8  | Positive | True | 17 | Positive | True  |
| 34 |                                                          |  | IC <sub>50</sub> = 3.41uM<br>(Low Activity)    | 5YE7 |                                          | Negative |  | 29 | Negative | True | 12 | Positive | False |
| 35 | cGMP-<br>dependent<br>3',5'-<br>cyclic                   |  | Ki =14 nM<br>(High Activity)                   | 6B96 | 10.1016/j.<br>bmcl.2017<br>.10.054       | Positive |  | 7  | Positive | True | 21 | Positive | True  |

|    |                                  |                                                                                     |                                                        |      |                               |          |                                                                                       |    |          |       |    |          |       |
|----|----------------------------------|-------------------------------------------------------------------------------------|--------------------------------------------------------|------|-------------------------------|----------|---------------------------------------------------------------------------------------|----|----------|-------|----|----------|-------|
| 36 | phosphodiesterase                | 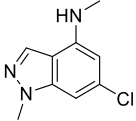   | $K_i = 22 \mu\text{M}$<br>(Low Activity)               | 6B98 |                               | Negative |                                                                                       | 74 | Negative | True  | 98 | Negative | True  |
| 37 | Bromodomain-containing protein 4 |    | $K_i = 33 \text{ nM}$<br>(High Activity)               | 5UER | -                             | Positive |    | 12 | Positive | True  | 15 | Positive | True  |
| 38 |                                  |    | $K_i = 9.5 \mu\text{M}$<br>(Low Activity)              |      | -                             | Negative |                                                                                       | 61 | Negative | True  | 92 | Negative | True  |
| 39 | Peregrin (BRPF family)           |    | $\text{IC}_{50} = 7.9 \text{ nM}$<br>(High Activity)   | 5T4V | 10.1021/a.cs.jmedchem.6b01583 | Positive |    | 14 | Positive | True  | 7  | Positive | True  |
| 40 |                                  |    | $\text{IC}_{50} = 0.43 \mu\text{M}$<br>(Low Activity)  |      |                               | Negative |                                                                                       | 27 | Negative | True  | 51 | Negative | True  |
| 41 | PCAF/GC N5                       |   | $\text{IC}_{50} = 0.86 \mu\text{M}$<br>(High Activity) | 5ML0 | 10.1021/a.cs.jmedchem.6b01566 | Positive |   | 41 | Negative | False | 26 | Negative | False |
| 42 |                                  |  | $\text{IC}_{50} = 16 \mu\text{M}$<br>(Low Activity)    | 5MKX |                               | Negative |                                                                                       | 86 | Negative | True  | 25 | Positive | False |
| 43 | PPC2/EE D                        |  | $\text{IC}_{50} = 0.43 \mu\text{M}$<br>(High Activity) | 5U62 | 10.1021/a.cs.jmedchem.6b01473 | Positive |  | 13 | Positive | True  | 19 | Positive | True  |

|    |                              |  |                                             |      |                                          |          |  |    |          |       |     |          |       |
|----|------------------------------|--|---------------------------------------------|------|------------------------------------------|----------|--|----|----------|-------|-----|----------|-------|
| 44 |                              |  | IC <sub>50</sub> =3.9 uM<br>(Low Activity)  | 5U5T |                                          | Negative |  | 43 | Negative | True  | 14  | Positive | False |
| 45 | Choline Kinase $\alpha$      |  | K <sub>d</sub> =0.01uM<br>(High Affinity)   | 5EQY | 10.1021/a<br>cs.jmedch<br>em.5b015<br>52 | Positive |  | 31 | Negative | False | 10  | Positive | True  |
| 46 |                              |  | K <sub>d</sub> =0.769uM<br>(Low Affinity)   |      |                                          | Negative |  | 28 | Positive | False | 104 | Negative | True  |
| 47 | Renin                        |  | IC <sub>50</sub> =38 nM<br>(High Activity)  | 5SZ9 | 10.1016/j.<br>bmc.2016.<br>09.030        | Positive |  | 16 | Positive | True  | 5   | Positive | True  |
| 48 |                              |  | IC <sub>50</sub> =43 uM<br>(Low Activity)   | 5SY3 |                                          | Negative |  | 57 | Negative | True  | 21  | Negative | True  |
| 49 | BCATm                        |  | IC <sub>50</sub> =0.2 uM<br>(High Activity) | 5I5X | 10.1021/a<br>cs.jmedch<br>em.5b016<br>07 | Positive |  | 35 | Negative | False | 8   | Positive | True  |
| 50 |                              |  | IC <sub>50</sub> =63 uM<br>(Low Activity)   | 5I5V |                                          | Negative |  | 94 | Negative | True  | 111 | Negative | True  |
| 51 | Catechol O-Methyltransferase |  | IC <sub>50</sub> =75 nM<br>(High Activity)  | 5K0L | 10.1021/a<br>cs.jmedch<br>em.6b009<br>27 | Positive |  | 10 | Positive | True  | 34  | Negative | False |
| 52 |                              |  | IC <sub>50</sub> =0.9 uM<br>(Low Activity)  | 5K0B |                                          | Negative |  | 56 | Negative | True  | 77  | Negative | True  |

|    |                       |                                                                                     |                                               |      |                                            |          |                                                                                      |    |          |      |    |          |      |
|----|-----------------------|-------------------------------------------------------------------------------------|-----------------------------------------------|------|--------------------------------------------|----------|--------------------------------------------------------------------------------------|----|----------|------|----|----------|------|
| 53 | Phospholipase A2      | 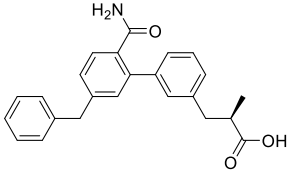   | IC <sub>50</sub> = 0.01 uM<br>(High Activity) | 5G3N | 10.1021/a<br>csmedche<br>mlett.6b00<br>188 | Positive |   | 5  | Positive | True | 9  | Positive | True |
| 54 |                       |    | IC <sub>50</sub> = 0.91 uM<br>(Low Activity)  | -    |                                            | Negative |                                                                                      | 16 | Negative | True | 60 | Negative | True |
| 55 | BRD9                  |    | IC <sub>50</sub> = 14 nM<br>(High Activity)   | 5F1H | 10.1021/a<br>cs.jmedch<br>em.5b018<br>65   | Positive |   | 16 | Positive | True | 15 | Positive | True |
| 56 |                       |    | IC <sub>50</sub> = 0.656 uM<br>(Low Activity) |      |                                            | Negative |                                                                                      | 36 | Negative | True | 17 | Negative | True |
| 57 | CBP/EP300 bromodomain |   | IC <sub>50</sub> = 0.03 uM<br>(High Activity) | 5I8G | 10.1021/a<br>csmedche<br>mlett.6b00<br>075 | Positive |  | 13 | Positive | True | 11 | Positive | True |
| 58 |                       |  | IC <sub>50</sub> = 0.53 uM<br>(Low Activity)  | 5I86 |                                            | Negative |                                                                                      | 18 | Negative | True | 60 | Negative | True |
| 59 | KEAP1                 |  | IC <sub>50</sub> = 1.3 nM<br>(High Activity)  | 5FNU | 10.1021/a<br>cs.jmedch<br>em.6b002<br>28   | Positive |                                                                                      | 20 | Positive | True | 5  | Positive | True |

|    |                   |                                                                                     |                                              |      |                                          |          |                                                                                       |    |          |       |    |          |       |
|----|-------------------|-------------------------------------------------------------------------------------|----------------------------------------------|------|------------------------------------------|----------|---------------------------------------------------------------------------------------|----|----------|-------|----|----------|-------|
| 60 |                   | 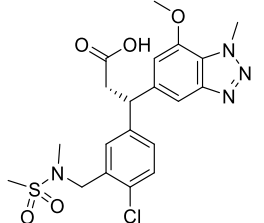   | IC <sub>50</sub> =3.4 uM<br>(Low Activity)   | 5FNS |                                          | Negative |    | 31 | Negative | True  | 74 | Negative | True  |
| 61 | FABP4             |    | Kd =37.4 nM<br>(High Activity)               | 6LJV | 10.1021/a<br>cs.jmedch<br>em.9b021<br>07 | Positive |    | 16 | Positive | True  | 10 | Positive | True  |
| 62 |                   |    | Kd =3741.9 nM<br>(Low Activity)              | -    |                                          | Negative |                                                                                       | 59 | Negative | True  | 42 | Negative | True  |
| 63 | LTA4<br>Hydrolase |    | IC <sub>50</sub> =0.57 uM<br>(High Activity) | 4Y2T | 10.1016/j.<br>bmc.2015.<br>03.083        | Positive |    | 39 | Negative | False | 18 | Positive | True  |
| 64 |                   |    | IC <sub>50</sub> =18.3 uM<br>(Low Activity)  | -    |                                          | Negative |                                                                                       | 73 | Negative | True  | 9  | Positive | False |
| 65 | BRD4              |   | IC <sub>50</sub> =15 nM<br>(High Activity)   | 6KEF | -                                        | Positive |  | 15 | Positive | True  | 12 | Positive | True  |
| 66 |                   |  | IC <sub>50</sub> =4.5 uM<br>(Low Activity)   | -    | -                                        | Negative |                                                                                       | 82 | Negative | True  | 41 | Negative | True  |



|    |       |                                                                                     |                                                 |      |                                            |          |                                                                                       |    |          |      |    |          |       |
|----|-------|-------------------------------------------------------------------------------------|-------------------------------------------------|------|--------------------------------------------|----------|---------------------------------------------------------------------------------------|----|----------|------|----|----------|-------|
| 67 | WDR5  | 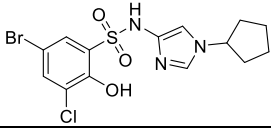   | $K_d = 0.4 \mu\text{M}$<br>(High Affinity)      | 6UJL | 10.1021/a<br>cs.jmedch<br>em.0c002<br>24   | Positive |    | 10 | Positive | True | 13 | Positive | True  |
| 68 |       |    | $K_d = 32 \mu\text{M}$<br>(Low Affinity)        | -    |                                            | Negative |                                                                                       | 90 | Negative | True | 85 | Negative | True  |
| 69 | Mek1  |    | $IC_{50} = 0.33 \mu\text{M}$<br>(High Activity) | 7B9L | 10.1021/a<br>csmedche<br>mlett.0c00<br>563 | Positive |    | 17 | Positive | True | 37 | Negative | False |
| 70 |       |    | $IC_{50} = 450 \mu\text{M}$<br>(Low Activity)   | -    |                                            | Negative |                                                                                       | 89 | Negative | True | 75 | Negative | True  |
| 71 | LLRK2 |    | $IC_{50} = 11 \text{ nM}$<br>(High Activity)    | 7BJR | 10.1021/a<br>cs.jmedch<br>em.1c007<br>20   | Positive |    | 15 | Positive | True | 75 | Negative | True  |
| 72 |       |    | $IC_{50} = 1.73 \mu\text{M}$<br>(Low Activity)  | 7BJM |                                            | Negative |                                                                                       | 34 | Negative | True | 46 | Positive | False |
| 73 | c-MET |   | $IC_{50} = 44 \text{ nM}$<br>(High Activity)    | -    | 10.1021/a<br>csmedche<br>mlett.0c00<br>392 | Positive |  | 16 | Positive | True | 5  | Positive | True  |
| 74 |       |  | $IC_{50} = 0.66 \mu\text{M}$<br>(Low Activity)  | 7B41 |                                            | Negative |                                                                                       | 31 | Negative | True | 59 | Negative | True  |

|    |                                            |                                                                                     |                                              |      |                                          |          |                                                                                       |    |          |       |    |          |       |
|----|--------------------------------------------|-------------------------------------------------------------------------------------|----------------------------------------------|------|------------------------------------------|----------|---------------------------------------------------------------------------------------|----|----------|-------|----|----------|-------|
| 75 | Axl                                        | 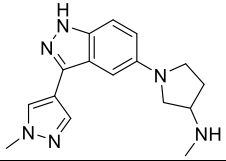   | IC <sub>50</sub> =37 nM<br>(High Activity)   | -    | 10.1074/jb<br>c.M116.7<br>71485          | Positive |    | 19 | Positive | True  | 13 | Positive | True  |
| 76 |                                            |    | IC <sub>50</sub> =0.432 uM                   | 5U6B |                                          | Negative |                                                                                       | 39 | Negative | True  | 11 | Positive | False |
| 77 | Notum<br>Carboxyle<br>sterase              |    | IC <sub>50</sub> =31 nM<br>(High Activity)   | 6ZVL | 10.1021/a<br>cs.jmedch<br>em.0c013<br>91 | Positive |    | 36 | Negative | False | 55 | Negative | False |
| 78 |                                            |    | IC <sub>50</sub> =41 uM<br>(Low Activity)    |      |                                          | Negative |                                                                                       | 61 | Negative | True  | 85 | Negative | True  |
| 79 | DNA<br>Gyrase                              |    | Kd= 17 nM<br>(High Affinity)                 | 6KZZ | 10.1021/a<br>csomega.0<br>c00865         | Positive |    | 8  | Positive | True  | 13 | Positive | True  |
| 80 |                                            |   | Kd=0.24uM<br>(Low Affinity)                  |      |                                          | Negative |                                                                                       | 19 | Negative | True  | 53 | Negative | True  |
| 81 | Enoyl-<br>carrier-<br>protein<br>reductase |  | IC <sub>50</sub> = 2.2 uM<br>(High Activity) | 6SQL | 10.1021/a<br>cs.jmedch<br>em.0c000<br>07 | Positive |  | 17 | Positive | True  | 31 | Negative | False |
| 82 |                                            |  | IC <sub>50</sub> =22 uM<br>(Low Activity)    |      |                                          | Negative |                                                                                       | 18 | Positive | False | 38 | Negative | True  |

|    |                              |                                                                                     |                                              |      |                                          |          |                                                                                       |    |          |       |    |          |       |
|----|------------------------------|-------------------------------------------------------------------------------------|----------------------------------------------|------|------------------------------------------|----------|---------------------------------------------------------------------------------------|----|----------|-------|----|----------|-------|
| 83 | JAK1                         | 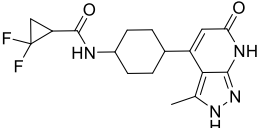   | IC <sub>50</sub> =64 nM<br>(High Activity)   | 6TPF | 10.1021/a<br>cs.jmedch<br>em.0c003<br>59 | Positive |    | 8  | Positive | True  | 16 | Positive | True  |
| 84 |                              |    | IC <sub>50</sub> =2.2 uM<br>(Low Activity)   | 6TPD |                                          | Negative |                                                                                       | 39 | Negative | True  | 42 | Negative | True  |
| 85 | DYRK1B                       |    | IC <sub>50</sub> = 65 nM<br>(High Activity)  | 7A5D | 10.1021/a<br>cs.jmedch<br>em.1c000<br>24 | Positive |    | 11 | Positive | True  | 43 | Negative | False |
| 86 |                              |    | IC <sub>50</sub> =3 uM<br>(Low Activity)     | -    |                                          | Negative |                                                                                       | 9  | Positive | False | 26 | Positive | False |
| 87 | DYRK1A                       |    | IC <sub>50</sub> =218 nM<br>(High Activity)  | 7AJ4 | 10.1021/a<br>cs.jmedch<br>em.1c000<br>23 | Positive |    | 18 | Positive | True  | 16 | Positive | True  |
| 88 |                              |   | IC <sub>50</sub> >10uM<br>(Low Activity)     | -    |                                          | Negative |                                                                                       | 63 | Negative | True  | 9  | Positive | False |
| 89 | Notum<br>Carboxyle<br>steras |  | IC <sub>50</sub> =0.11 uM<br>(High Activity) | 6YSK | 10.1021/a<br>cs.jmedch<br>em.0c006<br>60 | Positive |  | 15 | Positive | True  | 48 | Negative | False |
| 90 |                              |  | IC <sub>50</sub> =48 uM<br>(Low Activity)    | 6YV2 |                                          | Negative |                                                                                       | 71 | Negative | True  | 50 | Negative | True  |
| 91 | FGFR2                        |  | IC <sub>50</sub> =0.46 uM<br>(High Activity) | 7OZF | 10.1021/a<br>cs.jmedch<br>em.1c011<br>63 | Positive |  | 14 | Positive | True  | 17 | Positive | True  |

|    |       |                                                                                     |                                             |      |                                          |          |                                                                                       |    |          |       |    |          |       |
|----|-------|-------------------------------------------------------------------------------------|---------------------------------------------|------|------------------------------------------|----------|---------------------------------------------------------------------------------------|----|----------|-------|----|----------|-------|
| 92 |       | 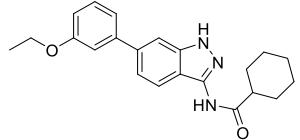   | IC <sub>50</sub> >10 uM<br>(Low Activity)   |      |                                          | Negative |                                                                                       | 10 | Positive | False | 57 | Negative | True  |
| 93 | ASH1L |    | IC <sub>50</sub> =4 uM<br>(High Activity)   | 6WZW | 10.1038/s<br>41467-<br>021-<br>23152-6   | Positive |    | 18 | Positive | True  | 35 | Negative | False |
| 94 |       |    | IC <sub>50</sub> =50.5 uM<br>(Low Activity) |      |                                          | Negative |                                                                                       | 84 | Negative | True  | 19 | Positive | False |
| 95 | MTH1  |    | IC <sub>50</sub> =6 nM<br>(High Activity)   | 6JVP | 10.1016/j.<br>bioorg.20<br>21.104813     | Positive |    | 6  | Positive | True  | 56 | Negative | False |
| 96 |       |   | IC <sub>50</sub> = 1.5 uM<br>(Low Activity) | 6JVG |                                          | Negative |                                                                                       | 25 | Negative | True  | 41 | Positive | False |
| 97 | MAT2A |  | IC <sub>50</sub> = 22 nM<br>(High Activity) | 7BHV | 10.1021/a<br>cs.jmedch<br>em.1c000<br>67 | Positive |  | 8  | Positive | True  | 18 | Positive | True  |

|     |       |  |                                               |      |                                            |          |  |    |          |      |    |          |       |
|-----|-------|--|-----------------------------------------------|------|--------------------------------------------|----------|--|----|----------|------|----|----------|-------|
| 98  |       |  | IC <sub>50</sub> =7.2 uM<br>(Low Activity)    | 7BHU |                                            | Negative |  | 30 | Negative | True | 46 | Negative | True  |
| 99  | SETD2 |  | IC <sub>50</sub> =0.818 uM<br>(High Activity) | -    | 10.1021/a<br>csmedche<br>mlett.1c00<br>272 | Positive |  | 6  | Positive | True | 14 | Positive | True  |
| 100 |       |  | IC <sub>50</sub> =170 uM<br>(Low Activity)    | 7LZB |                                            | Negative |  | 91 | Negative | True | 54 | Negative | True  |
| 101 | BRD4  |  | PIC <sub>50</sub> =7.7<br>(High Activity)     | 7OE6 | 10.1021/a<br>cs.jmedch<br>em.1c003<br>65   | Positive |  | 14 | Positive | True | 44 | Negative | False |
| 102 |       |  | PIC <sub>50</sub> =4.9<br>(Low Activity)      |      |                                            | Negative |  | 61 | Negative | True | 95 | Negative | True  |
| 103 | BPTF  |  | IC <sub>50</sub> =32 nM<br>(High Activity)    | -    | -                                          | Positive |  | 16 | Positive | True | 9  | Positive | True  |
| 104 |       |  | IC <sub>50</sub> =0.698 uM<br>(Low Activity)  | 7F5D | -                                          | Negative |  | 28 | Negative | True | 37 | Negative | True  |

|     |                                   |  |                                              |      |                                          |          |  |    |          |       |    |          |       |
|-----|-----------------------------------|--|----------------------------------------------|------|------------------------------------------|----------|--|----|----------|-------|----|----------|-------|
| 105 | Tim-3                             |  | IC <sub>50</sub> =0.75 uM<br>(High Activity) | 7M3Z | 10.1021/a<br>cs.jmedch<br>em.1c013<br>36 | Positive |  | 17 | Positive | True  | 11 | Positive | True  |
| 106 |                                   |  | IC <sub>50</sub> =4.9 uM<br>(Low Activity)   | 7M3Y |                                          | Negative |  | 41 | Negative | True  | 39 | Negative | True  |
| 107 | DYRK2                             |  | IC <sub>50</sub> =0.6 nM<br>(High Activity)  | 8HLT | -                                        | Positive |  | 5  | Positive | True  | 17 | Positive | True  |
| 108 |                                   |  | IC <sub>50</sub> =1.41 uM<br>(Low Activity)  | 7EJV | 10.1038/s<br>41467-<br>022-<br>30581-4   | Negative |  | 27 | Negative | True  | 90 | Negative | True  |
| 109 | Acetohydr<br>oxyacid<br>synthase  |  | K <sub>i</sub> =9.4 nM<br>(High Activity)    | -    | -                                        | Positive |  | 9  | Positive | True  | 31 | Negative | False |
| 110 |                                   |  | K <sub>i</sub> =127 nM<br>(Low Activity)     | 1YHZ | 10.1073/p<br>nas.05087<br>01103          | Negative |  | 19 | Negative | True  | 24 | Positive | False |
| 111 | Protoporp<br>hyrinogen<br>Oxidase |  | IC <sub>50</sub> =0.28 uM<br>(High Activity) | 3I6D | 10.1016/j.<br>jsb.2009.1<br>1.012        | Positive |  | 9  | Positive | True  | 19 | Positive | True  |
| 112 |                                   |  | IC <sub>50</sub> =4.00 uM<br>(Low Activity)  |      |                                          | Negative |  | 6  | Positive | False | 21 | Negative | True  |
| 113 | Ecdysone<br>receptor              |  | pIC <sub>50</sub> > 8.81<br>(High Activity)  | 1R20 | 10.1038/n<br>ature0211<br>2              | Positive |  | 12 | Positive | True  | 20 | Positive | True  |

|     |                                                    |  |                                              |      |                                 |          |  |    |          |       |     |          |       |
|-----|----------------------------------------------------|--|----------------------------------------------|------|---------------------------------|----------|--|----|----------|-------|-----|----------|-------|
| 114 |                                                    |  | pIC <sub>50</sub> =5.92<br>(Low Activity)    |      |                                 | Negative |  | 76 | Negative | True  | 92  | Negative | True  |
| 115 | Nicotinic<br>acetylcholine<br>Receptors            |  | K <sub>i</sub> =2.2 nM<br>(High Activity)    | 3C79 | 10.1073/p<br>nas.08021<br>97105 | Positive |  | 6  | Positive | True  | 15  | Positive | True  |
| 116 |                                                    |  | K <sub>i</sub> =100 nM<br>(Low Activity)     |      |                                 | Negative |  | 13 | Negative | True  | 6   | Positive | False |
| 117 | Complex<br>II                                      |  | IC <sub>50</sub> =8.61 μM<br>(High Activity) | -    | 10.3390/ij<br>ms160715<br>287   | Positive |  | 17 | Positive | True  | 25  | Negative | False |
| 118 |                                                    |  | IC <sub>50</sub> =45.9 μM<br>(Low Activity)  | 4YXD |                                 | Negative |  | 12 | Positive | False | 37  | Negative | True  |
| 119 | Complex<br>III                                     |  | K <sub>i</sub> = 83 nM<br>(High Activity)    | 3TGU | 10.1021/ja<br>3001908           | Positive |  | 9  | Positive | True  | 3   | Positive | True  |
| 120 |                                                    |  | K <sub>i</sub> > 10μM<br>(Low Activity)      | -    |                                 | Negative |  | 28 | Negative | True  | 36  | Negative | True  |
| 121 | 4-<br>hydroxyp<br>henylpyru<br>vate<br>dioxygenase |  | K <sub>i</sub> =24 nM<br>(High Activity)     | 5YY7 | -                               | Positive |  | 13 | Positive | True  | 9   | Positive | True  |
| 122 |                                                    |  | K <sub>i</sub> =0.247 μM<br>(Low Activity)   | 5YWG | 10.1111/fe<br>bs.14747          | Negative |  | 18 | Negative | True  | 104 | Negative | True  |

**Table S2. Comparison of ACFIS2 with other computational tools for FBDD in key features.**

| <b>FBDD Step</b>                      | <b>Tool</b>  | <b>Form</b>                                                                                                                | <b>Functionality</b>                           | <b>Input</b>                                  | <b>Output</b>                                                         |
|---------------------------------------|--------------|----------------------------------------------------------------------------------------------------------------------------|------------------------------------------------|-----------------------------------------------|-----------------------------------------------------------------------|
| Fragment screening                    | SEED         | Software                                                                                                                   | Fragment docking                               | Protein structure                             | Suggested core fragment                                               |
| Fragment-to-Lead                      | FragPELE     | Software (command line operation)                                                                                          | Fragment growing                               | Protein–ligand complex file                   | Protein–suggested ligand complex file                                 |
|                                       | DeepFrag     | Browser app ( <a href="http://durrantlab.pitt.edu/deepfrag/">http://durrantlab.pitt.edu/deepfrag/</a> )                    | Fragment growing                               | Receptor and ligand structure file            | Suggested-fragments table                                             |
|                                       | Delinker     | Software (command line operation)                                                                                          | Fragment linking                               | Fragment (SMILES) and receptor structure file | Generated molecules (SMILES)                                          |
|                                       | SyntaLinker  | Software (command line operation)                                                                                          | Fragment linking                               | Fragment file                                 | Generated molecules                                                   |
|                                       | Autogrow     | Software                                                                                                                   | Fragment growing                               | Fragment file                                 | Generated molecules                                                   |
|                                       | LigBuilder 2 | Software (command line operation)                                                                                          | Fragment growing / linking / mutation          | Receptor structure file                       | Suggested-ligand file                                                 |
| Fragment screening + Fragment-to Lead | ACFIS 2.0    | Web server ( <a href="http://chemyang.ccnu.edu.cn/ccb/server/ACFIS2/">http://chemyang.ccnu.edu.cn/ccb/server/ACFIS2/</a> ) | Fragment hit identification + Fragment growing | Protein–ligand complex file                   | Protein-suggested ligand / core fragment complex file and ligand file |



## Reference

- [1] Case D A, Cheatham III T E, Darden T, et al. The Amber biomolecular simulation programs. *Journal of Computational Chemistry*, 2005, 26, 1668-1688.
- [2] Kolb P, Caflisch A. Automatic and efficient decomposition of two-dimensional structures of small molecules for fragment-based high-throughput docking. *Journal of Medicinal Chemistry*, 2006, 49, 7384-7392.
- [3] Miller III B R, McGee Jr T D, Swails J M, et al. MMPBSA.py: an efficient program for end-state free energy calculations. *Journal of Chemical Theory and Computation*, 2012, 8, 3314-3321.
- [4] Sun H, Duan L, Chen F, et al. Assessing the performance of MM/PBSA and MM/GBSA methods. 7. Entropy effects on the performance of end-point binding free energy calculation approaches. *Physical Chemistry Chemical Physics*, 2018, 20, 14450-14460.
- [5] Maier J A, Martinez C, Kasavajhala K, et al. ff14SB: improving the accuracy of protein side chain and backbone parameters from ff99SB. *Journal of Chemical Theory and Computation*, 2015, 11, 3696-3713.
- [6] Wang J, Wolf R M, Caldwell J W, et al. Development and testing of a general amber force field. *Journal of Computational Chemistry*, 2004, 25, 1157-1174.
- [7] Mark P, Nilsson L. Structure and dynamics of the TIP3P, SPC, and SPC/E water models at 298 K. *The Journal of Physical Chemistry A*, 2001, 105, 9954-9960.
- [8] Durrant J D, Lindert S, McCammon J A. AutoGrow 3.0: an improved algorithm for chemically tractable, semi-automated protein inhibitor design. *Journal of Molecular Graphics and Modelling*, 2013, 44, 104-112.
- [9] Moriwaki H, Tian Y S, Kawashita N, et al. Mordred: a molecular descriptor calculator. *Journal of Cheminformatics*, 2018, 10, 1-14.
- [10] Lipinski C A, Lombardo F, Dominy B W, et al. Experimental and computational approaches to estimate solubility and permeability in drug discovery and development settings. *Advanced Drug Delivery Reviews*, 2012, 64, 4-17.
- [11] Ghose A K, Viswanadhan V N, Wendoloski J J. A knowledge-based approach in designing combinatorial or medicinal chemistry libraries for drug discovery. 1. A qualitative and quantitative characterization of known drug databases. *Journal of Combinatorial Chemistry*, 1999, 1, 55-68.
- [12] Bickerton G R, Paolini G V, Besnard J, et al. Quantifying the chemical beauty of drugs. *Nature Chemistry*, 2012, 4, 90-98.
- [13] Hao G, Dong Q, Yang G. A comparative study on the constitutive properties of marketed pesticides. *Molecular informatics*, 2011, 30, 614-622.

[14] Ertl P, Schuffenhauer A. Estimation of synthetic accessibility score of drug-like molecules based on molecular complexity and fragment contributions. *Journal of Cheminformatics*, 2009, 1, 1-11.
